# Supplementary material for: Promoter interactome of human embryonic stem cell-derived cardiomyocytes connects GWAS regions to cardiac gene networks
Source: PubMed Central journal article supplement (PMC6023870; doi:10.1038/s41467-018-04931-0), 2018-06-28
Supplement: 41467_2018_4931_MOESM3_ESM.pdf [file 41467_2018_4931_MOESM3_ESM.pdf]

## **Description of Additional Supplementary Files**

File Name: Supplementary Data 1

Description: List of 179880 significant hESC-CM promoter-genome interactions with average read counts from three biological replicates.

File Name: Supplementary Data 2

Description: List of cardiac VISTA enhancers (with their bracketing genes) that intersect with cPIRs (with their target genes).

File Name: Supplementary Data 3

Description: List of connected subnetworks constructed from top 20% of hESCCM promoter interactions for read counts.

File Name: Supplementary Data 4

Description: List of significant ( $p < 1 \times 10^{-5}$ ) SNPs from the GWAS of cardiac conduction and rhythm disorders located within cPIRs and the genes they interact with.
